# Supplementary material for: Synthesis and antiviral activity of camphor-based 1,3-thiazolidin-4-one and thiazole derivatives as Orthopoxvirus-reproduction inhibitors
Source: Royal Society of Chemistry journal article supplement (doi:10.1039/c8md00347e), 2018-01-01

## Supplementary Information

### Synthesis and Antiviral Activity of Camphor-Based 1,3-Thiazolidin-4-one and Thiazole Derivatives as *Orthopoxvirus*-Reproduction Inhibitors

Anastasiya S. Sokolova<sup>\*a</sup>, Olga I. Yarovaya<sup>a,b</sup>, Nikolay I. Bormotov<sup>c</sup>, Larisa N. Shishkina<sup>c</sup>,  
Nariman F. Salakhutdinov<sup>a,ba</sup>

---

<sup>a.</sup> Novosibirsk Institute of Organic Chemistry, Siberian Branch of the Russian Academy of Sciences, Lavrentjev Avenue 9, 630090 Novosibirsk, Russia.

<sup>b.</sup> Novosibirsk State University, Pirogova St. 2, 630090 Novosibirsk, Russia

<sup>c.</sup> State Research Center of Virology and Biotechnology VECTOR, Koltsovo, Novosibirsk Region, 630559, Russia

Corresponding author E-mail: asokolova@nioch.nsc.ru

NMR <sup>1</sup>H and <sup>13</sup>C spectra

# Compound 4a

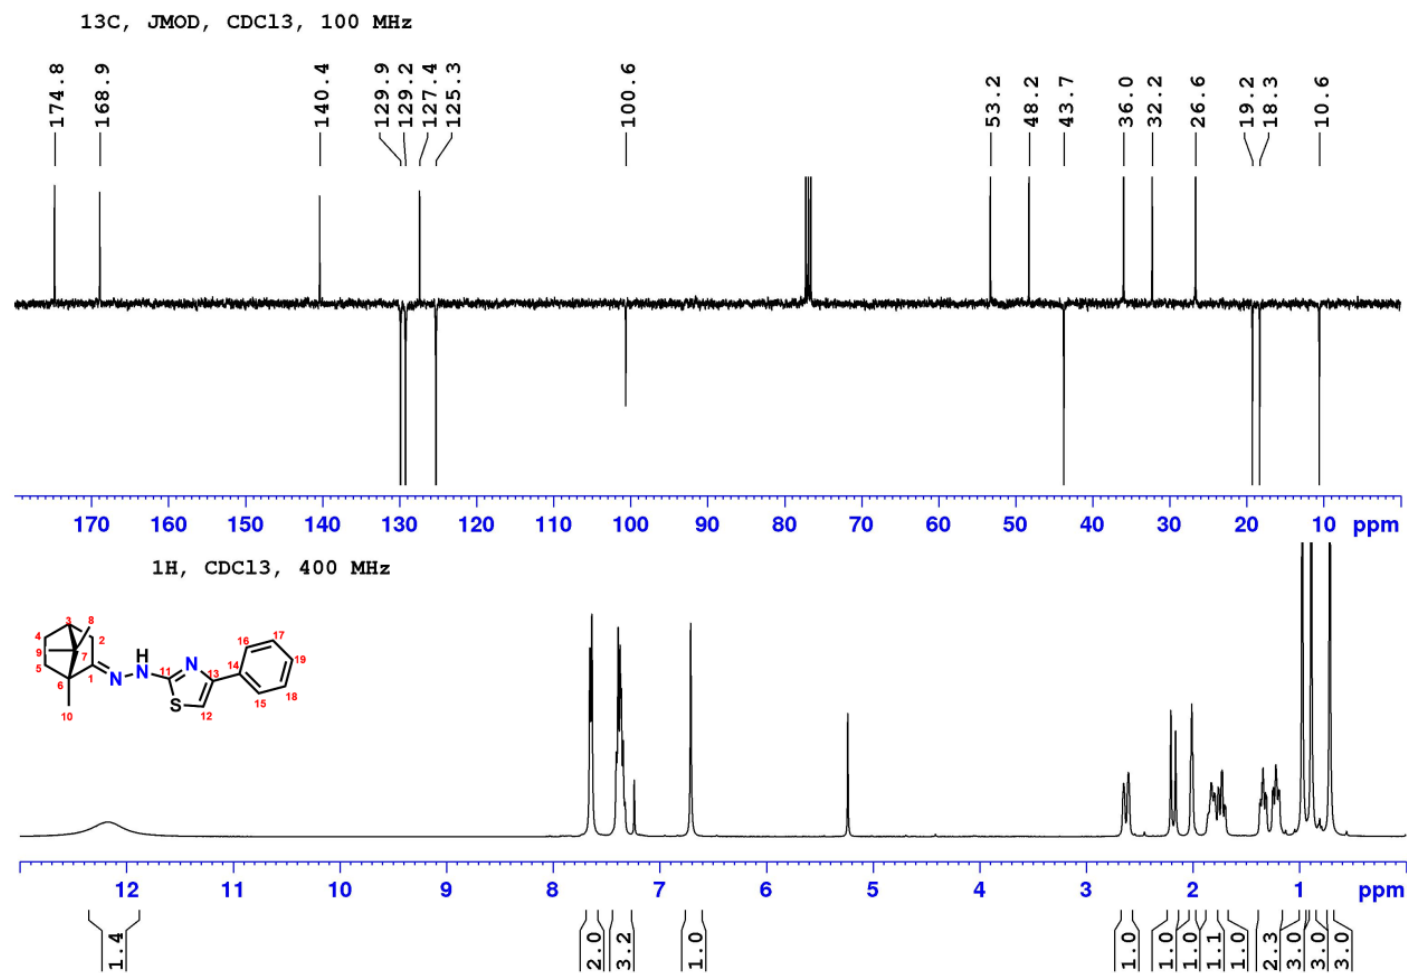

# Compound 4b

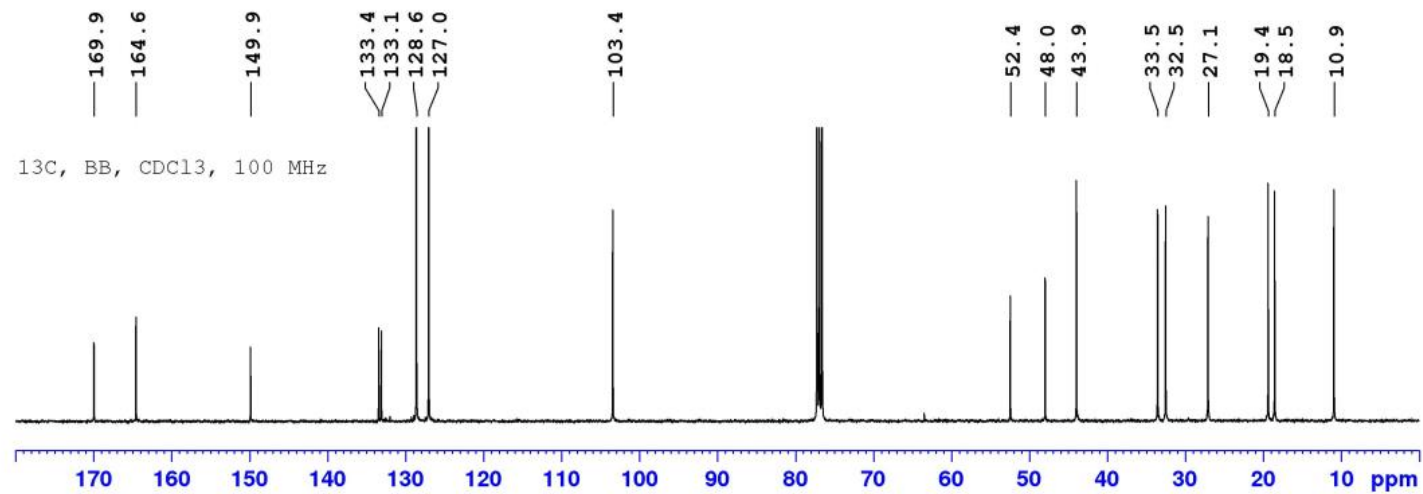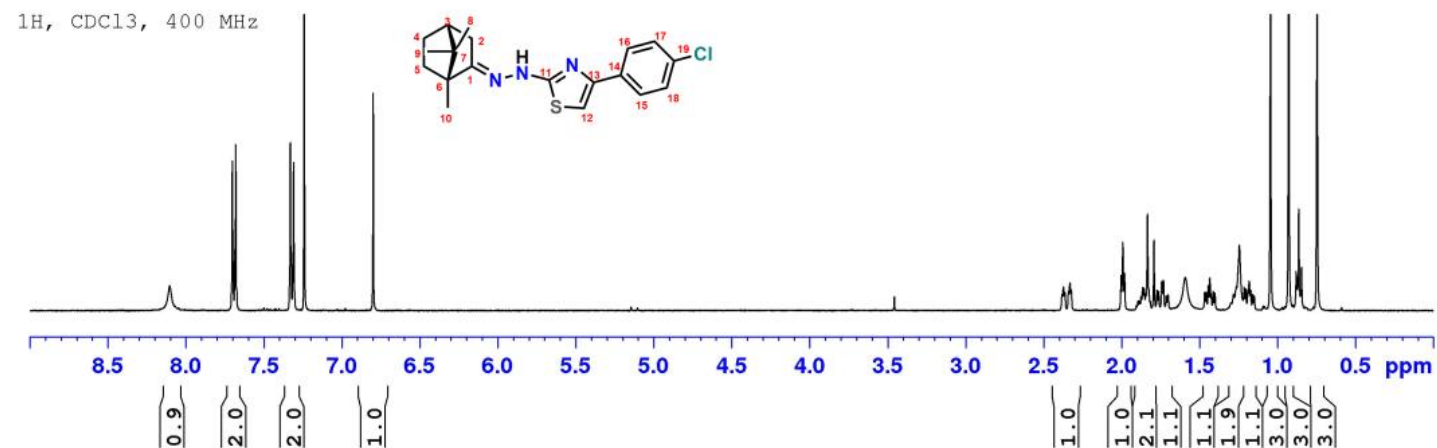

### Compound 4c

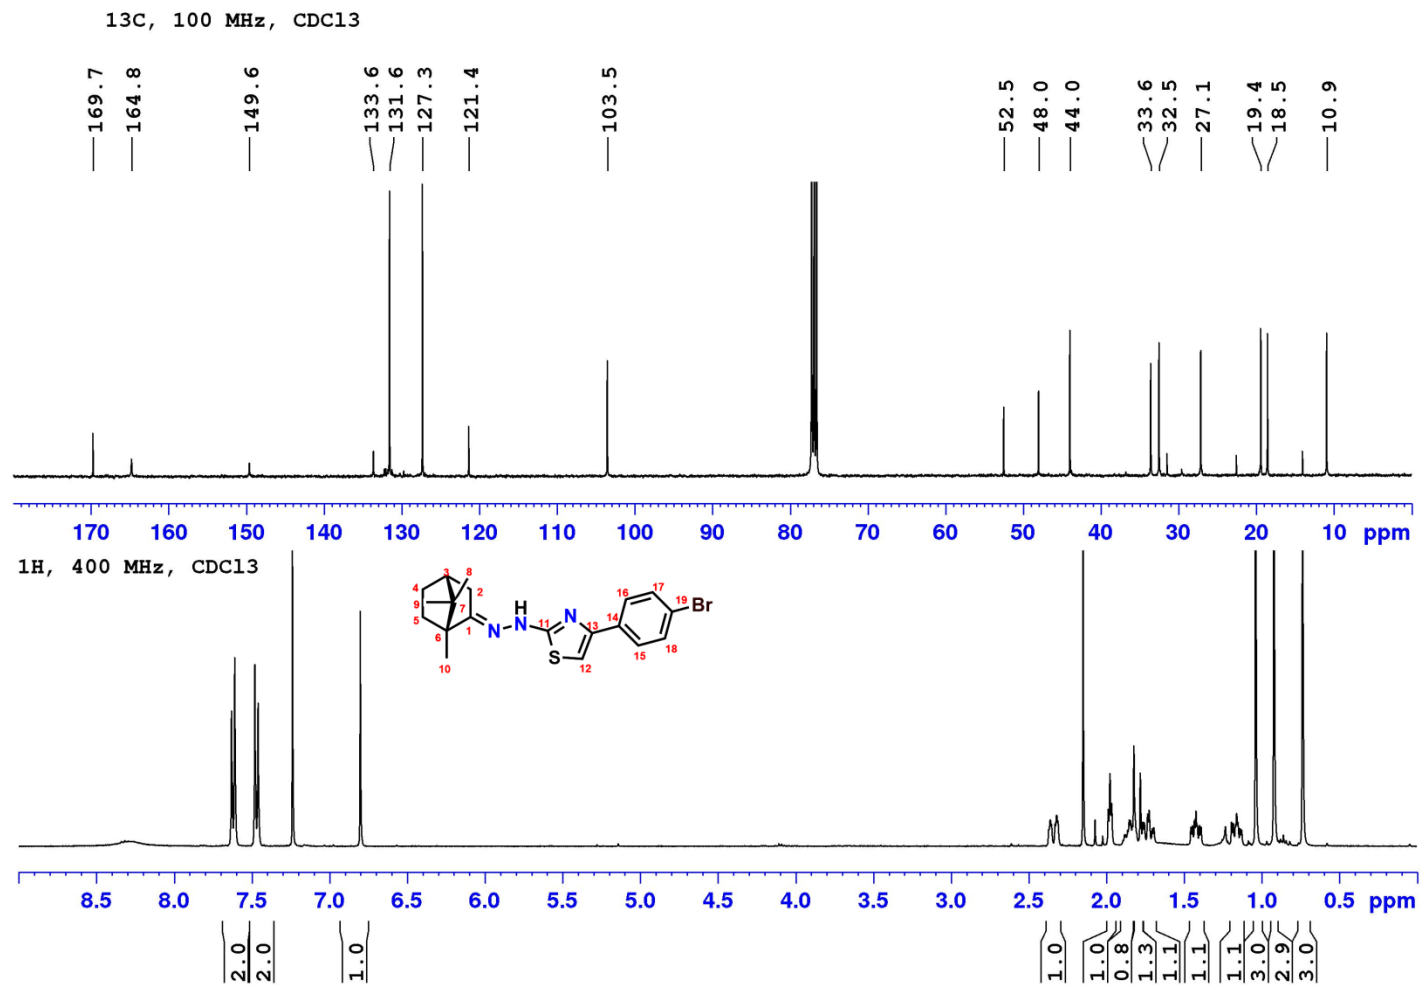

# Compound 4d

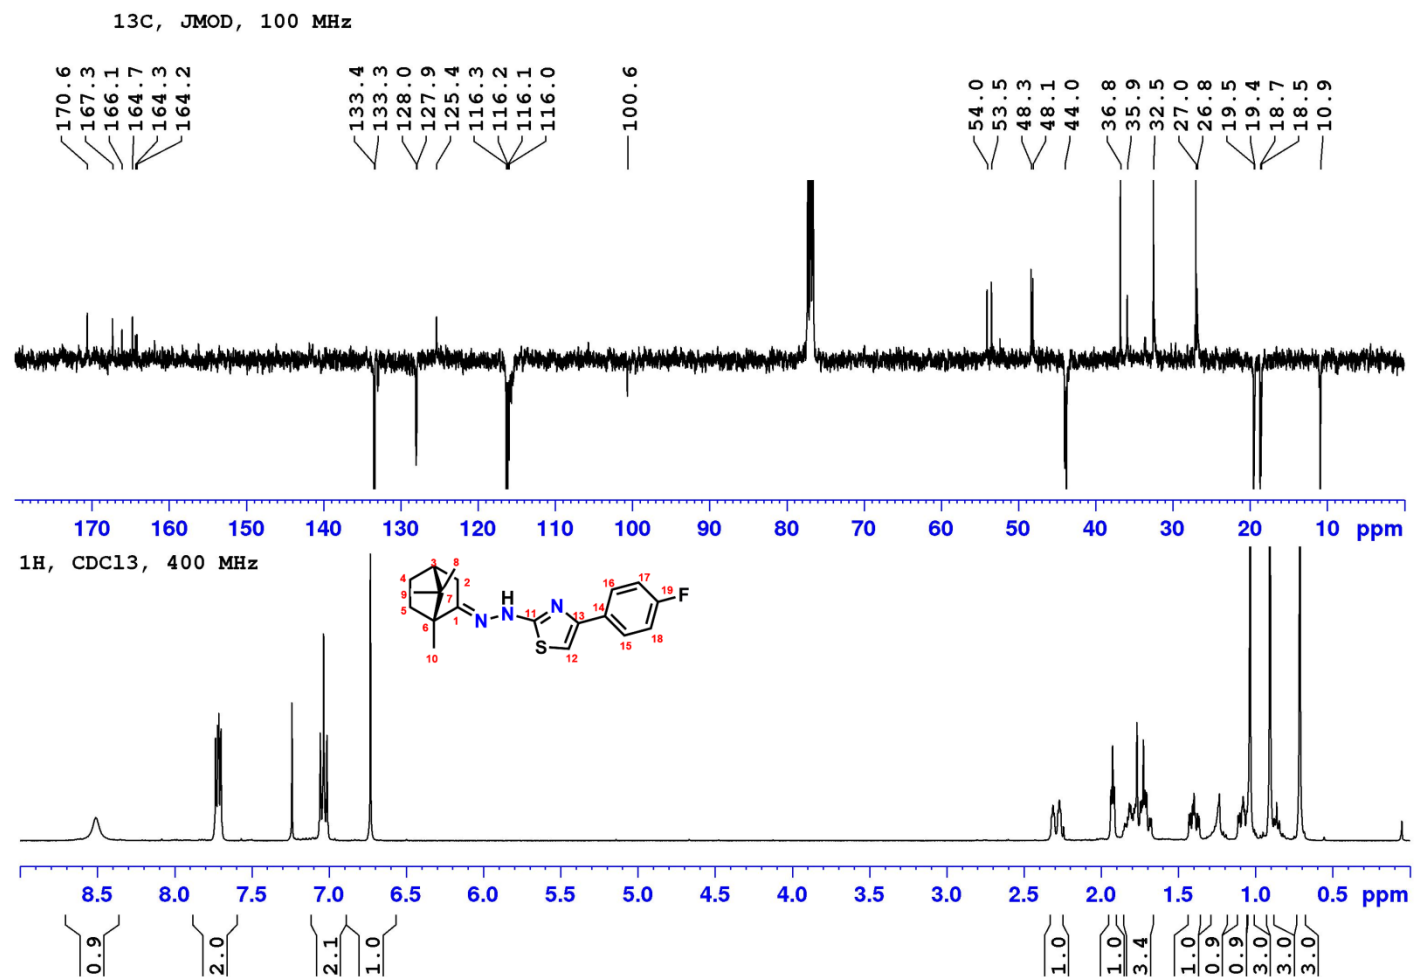

# Compound 4e

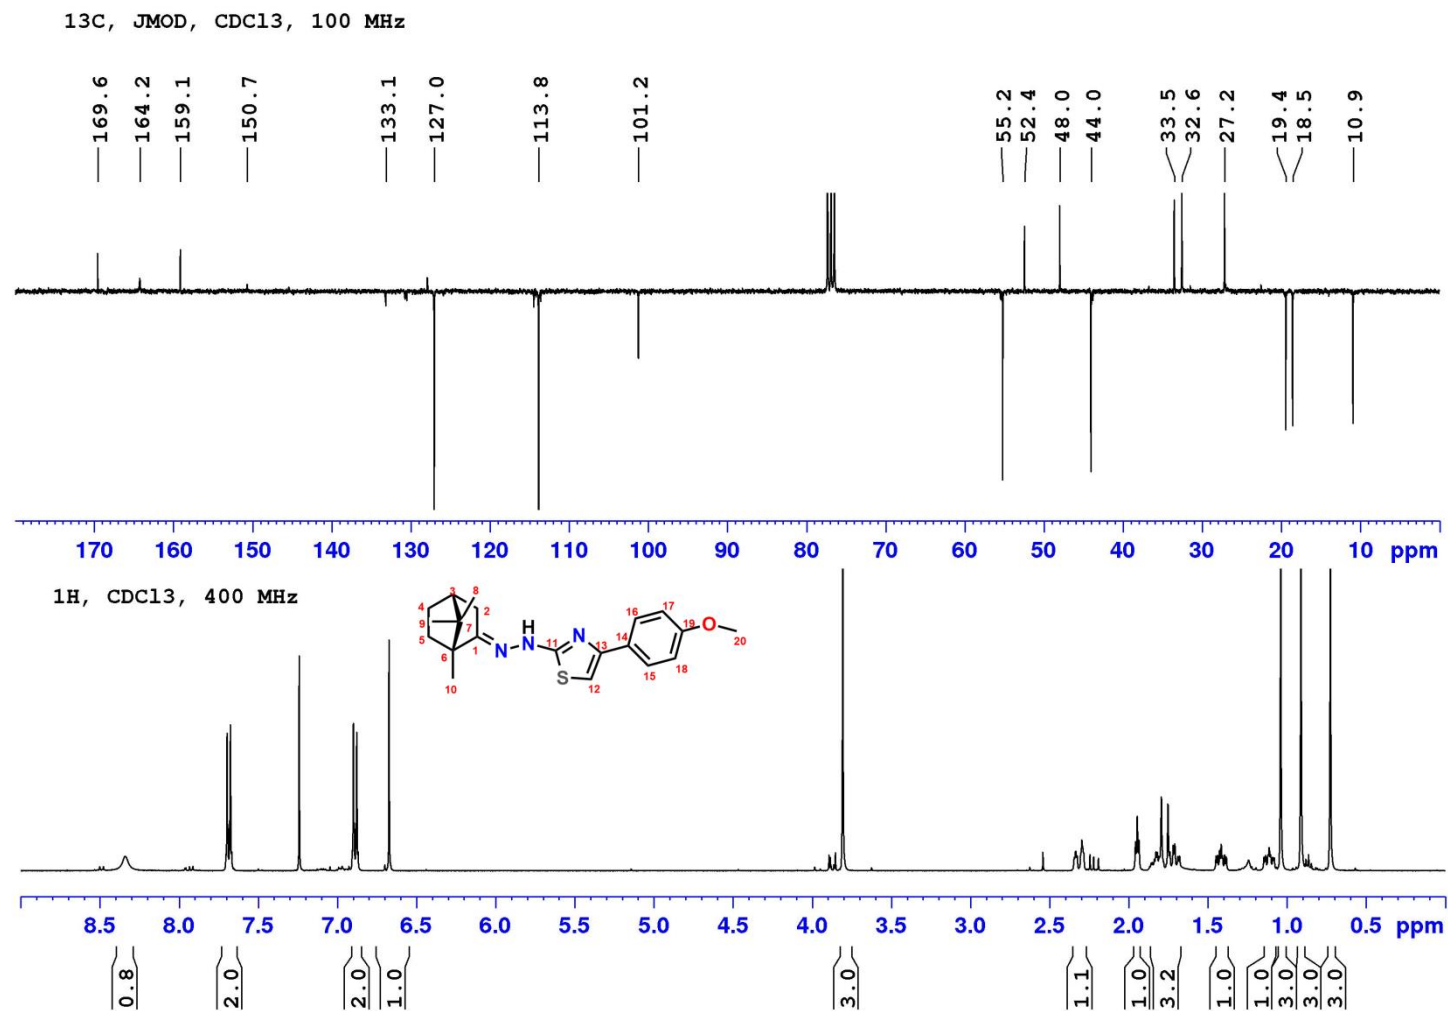

# Compound 4f

<sup>13</sup>C, JMOD, CDCl<sub>3</sub>, 100 MHz

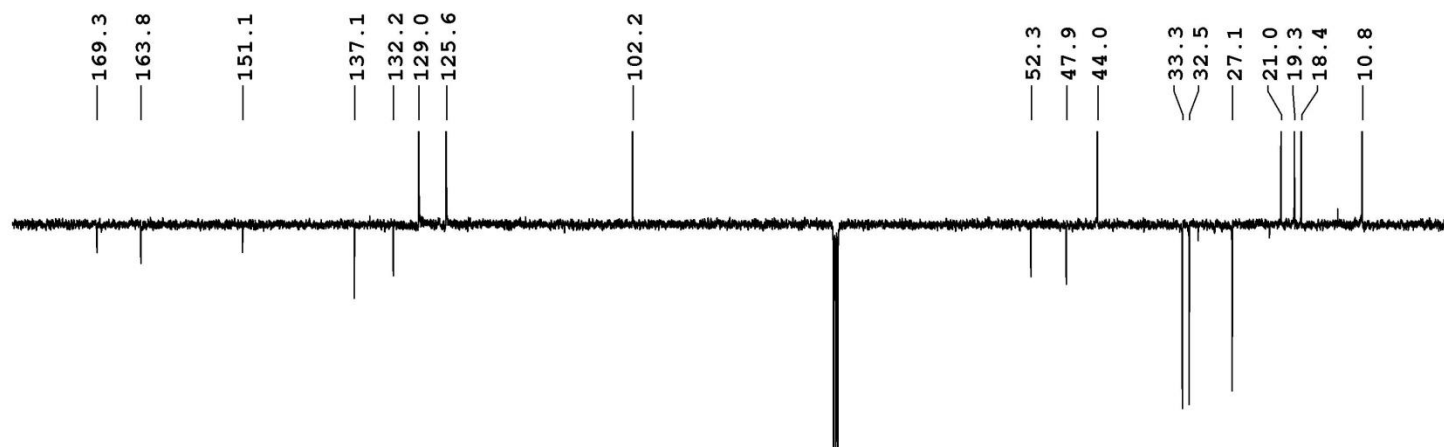

<sup>1</sup>H, CDCl<sub>3</sub>, 400 MHz

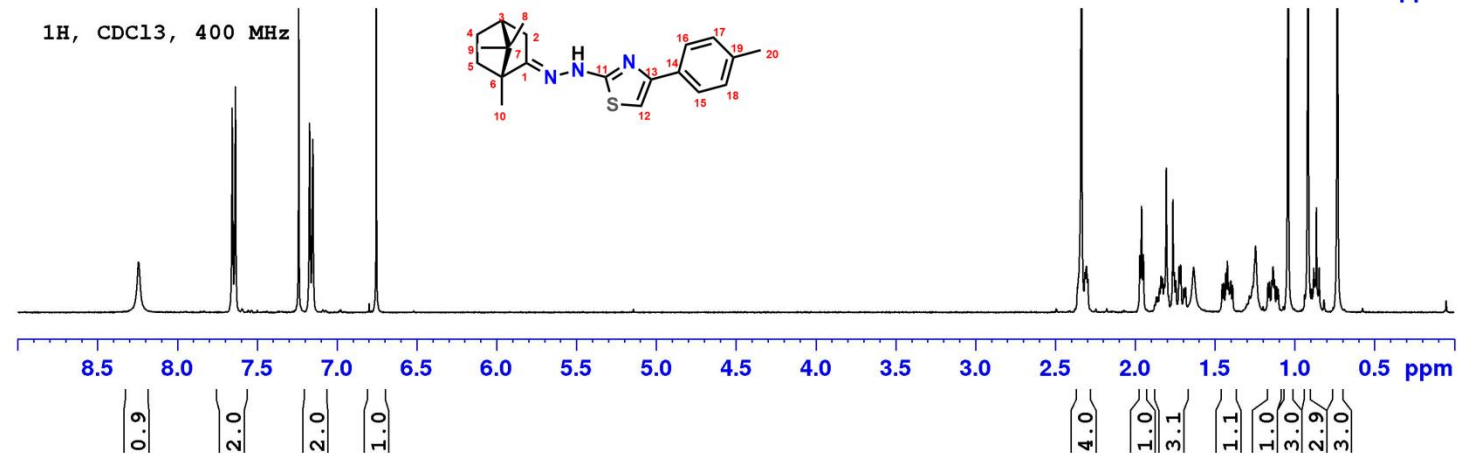

# Compound 4g

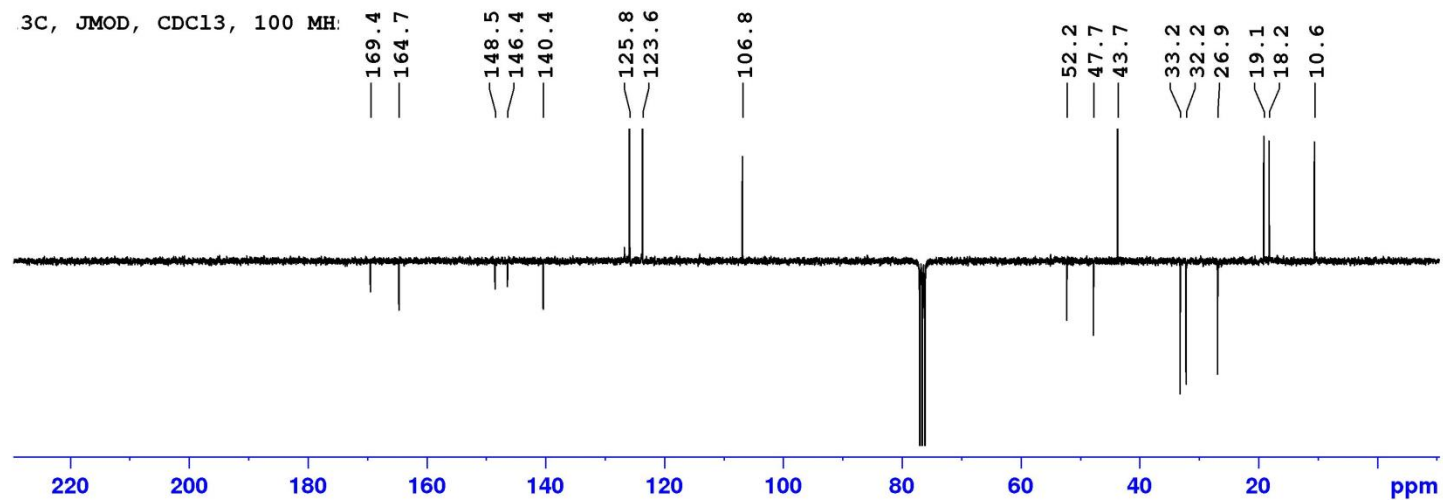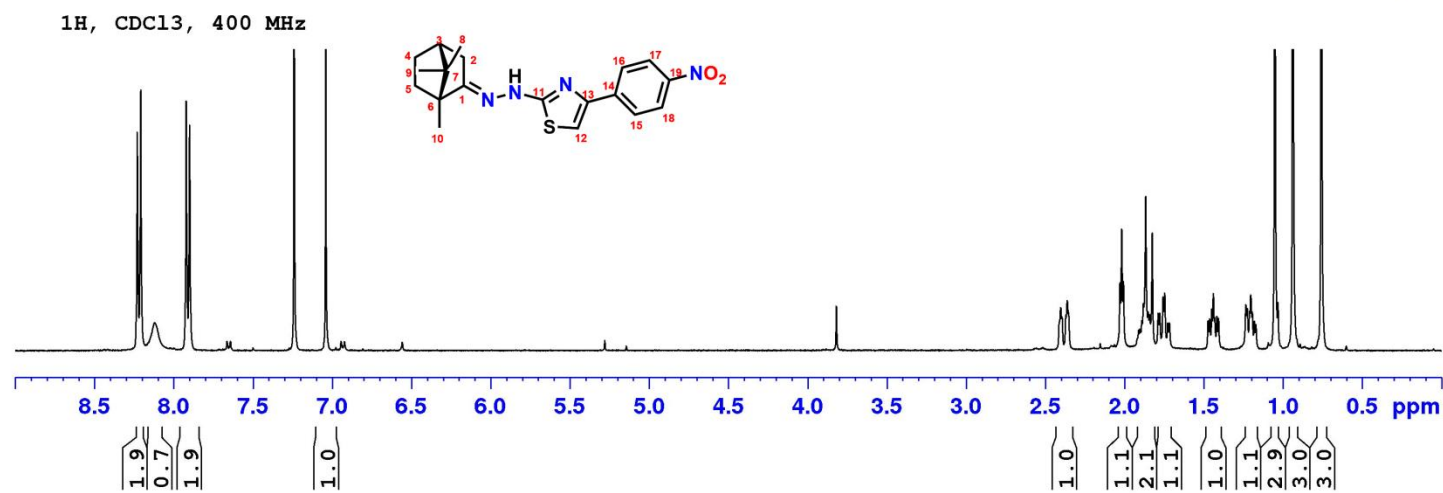



## Compound 5

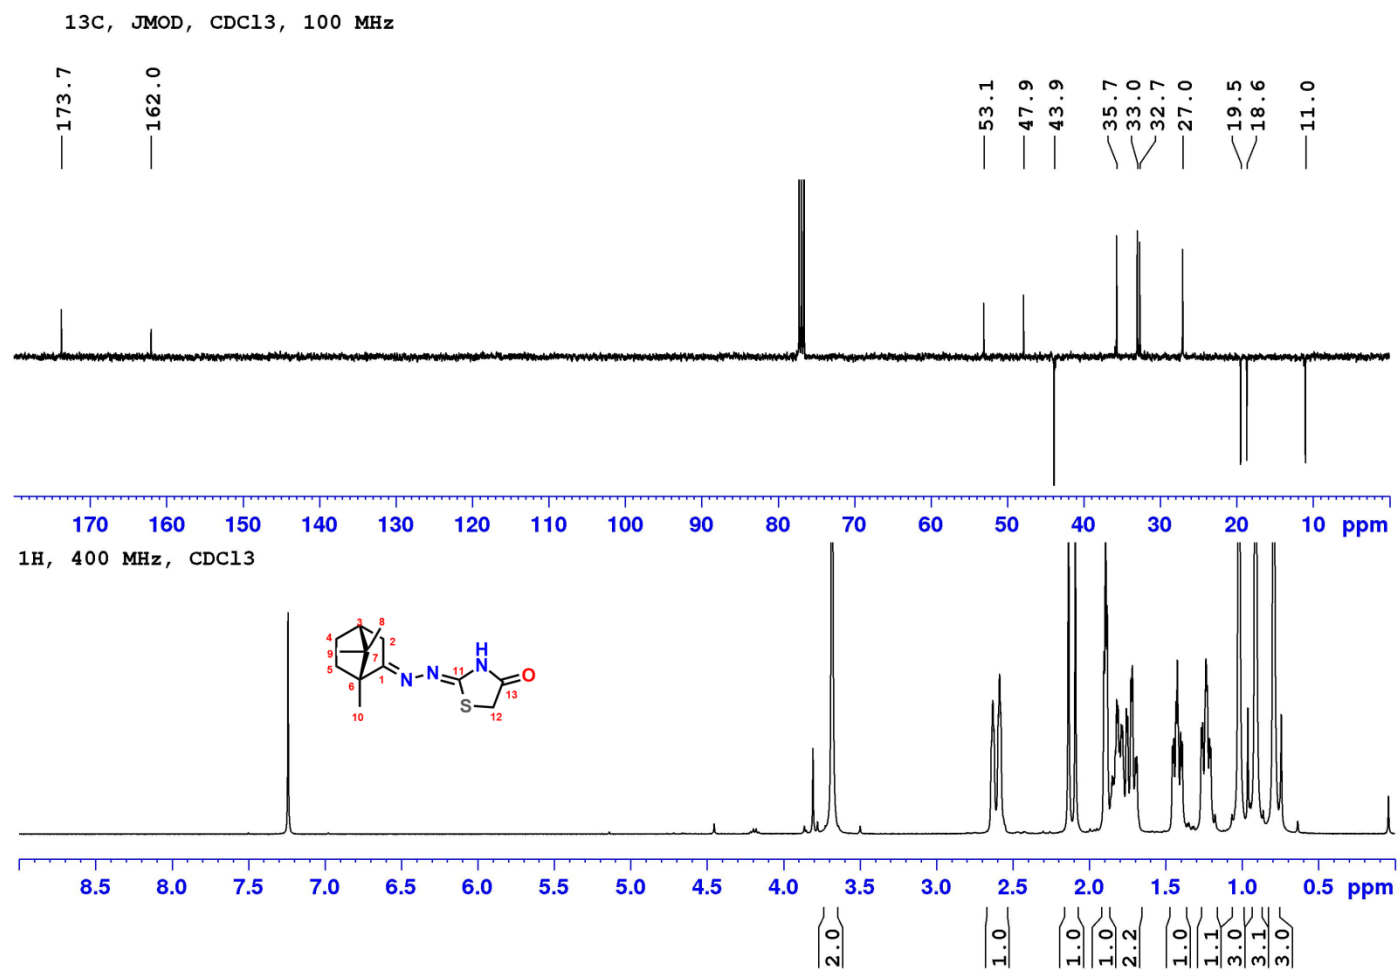

## Compound 6a

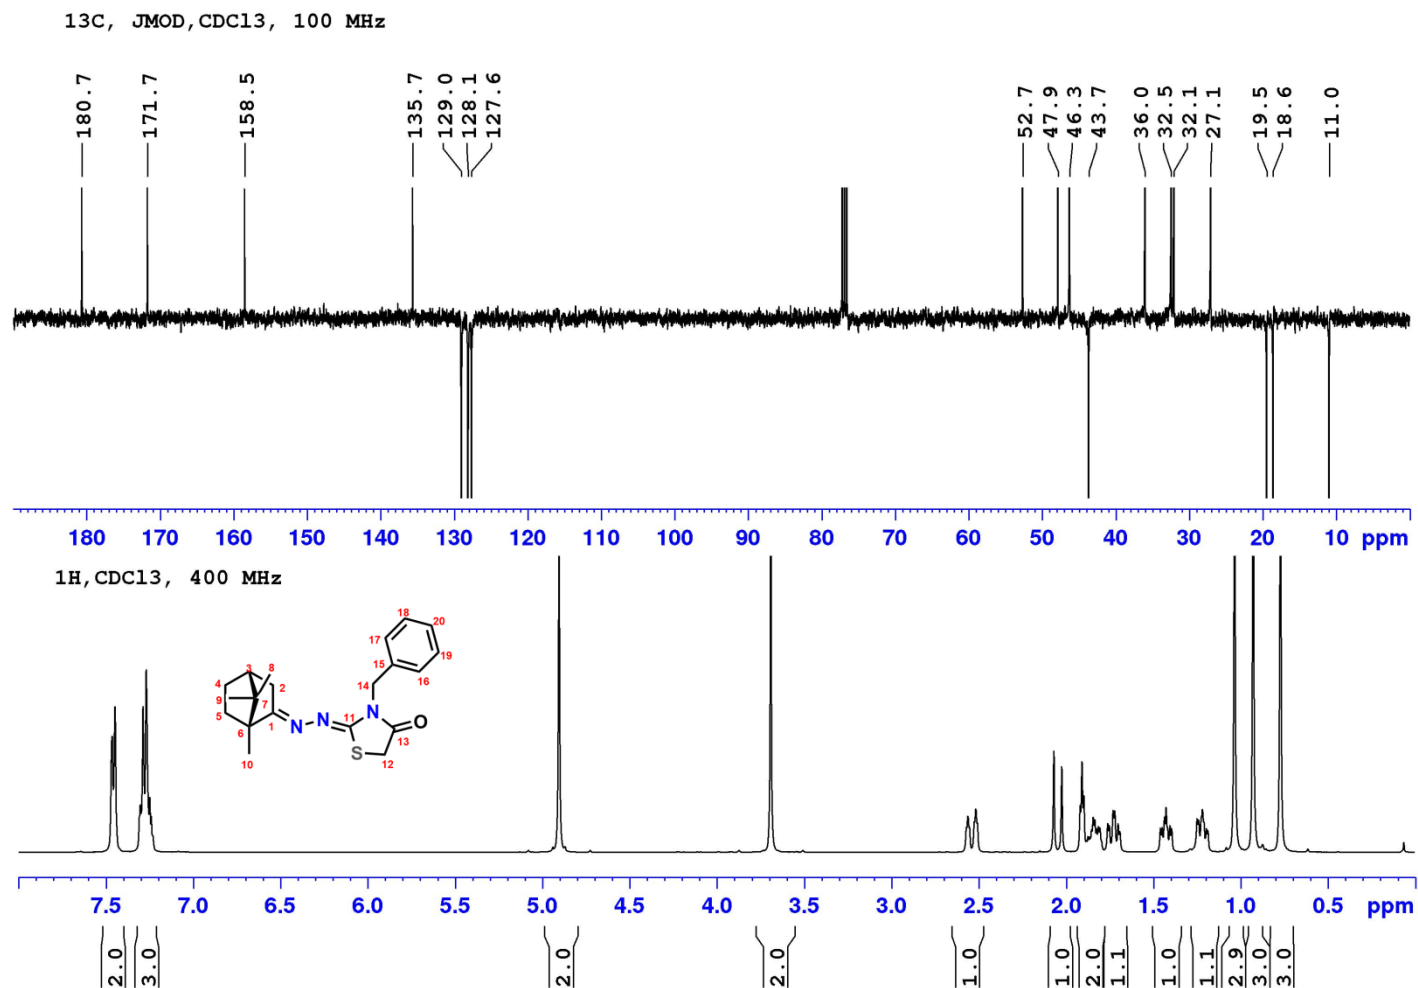

# Compound 6b

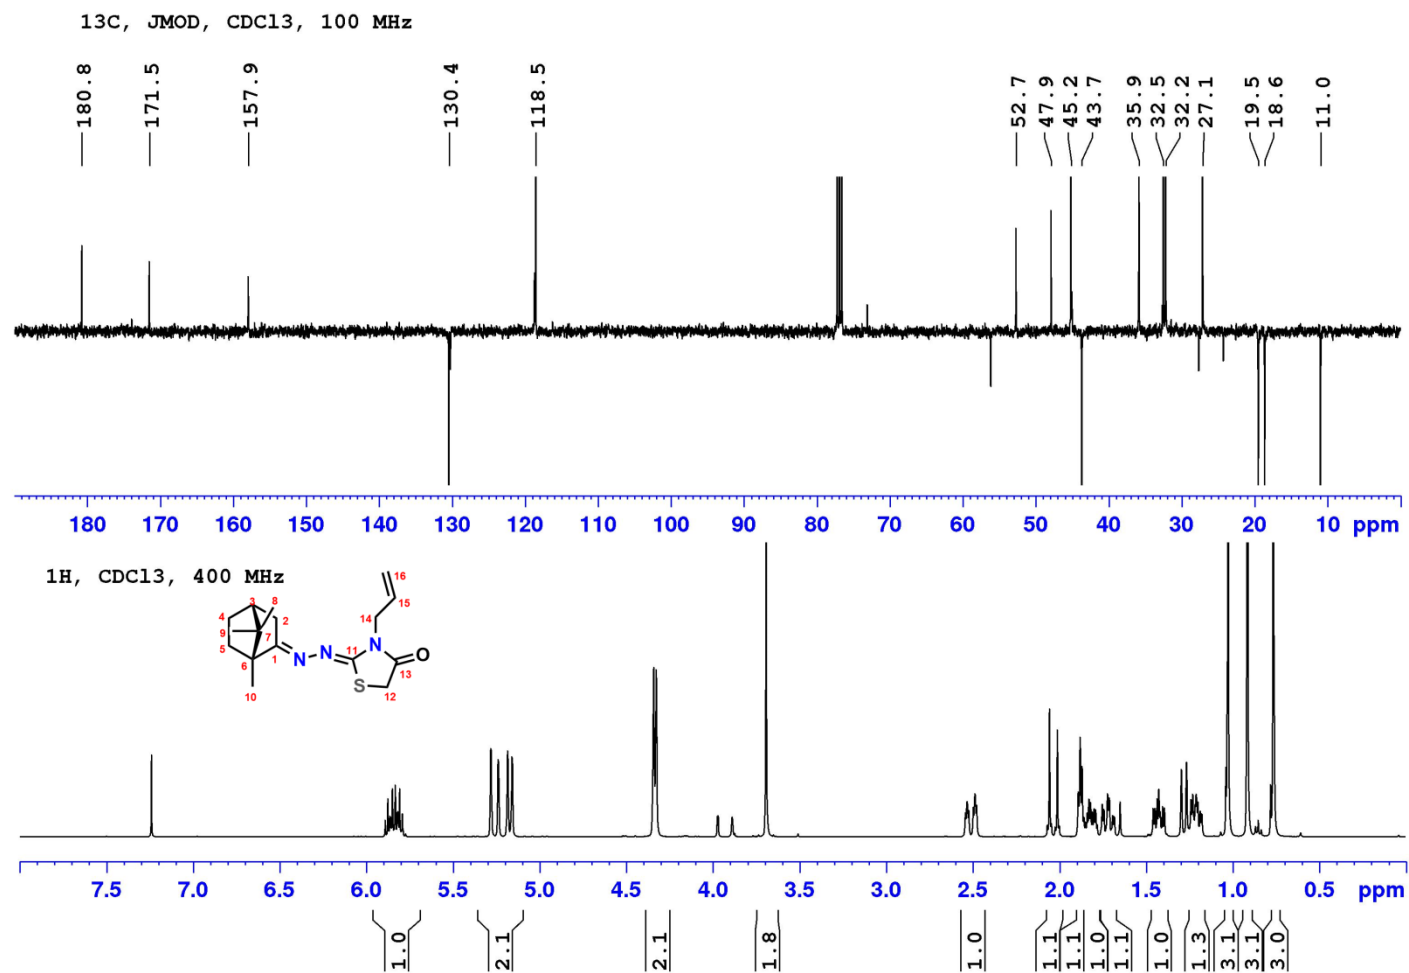

# Compound 6c

<sup>13</sup>C, JMOD, CDCl<sub>3</sub>, 100 MHz

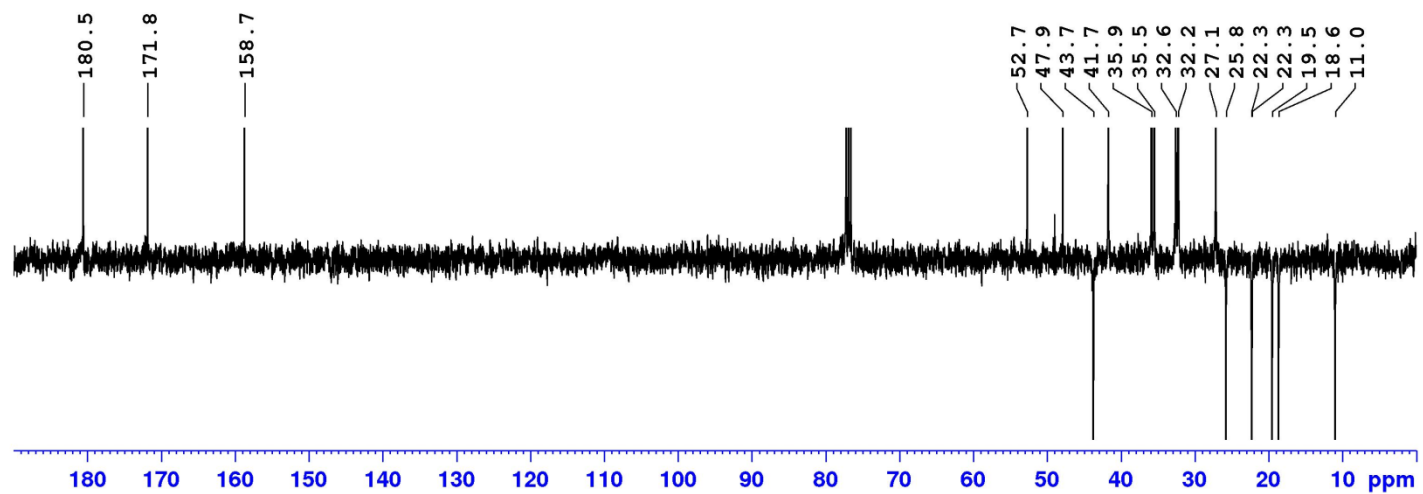

<sup>1</sup>H, CDCl<sub>3</sub>, 400 MHz

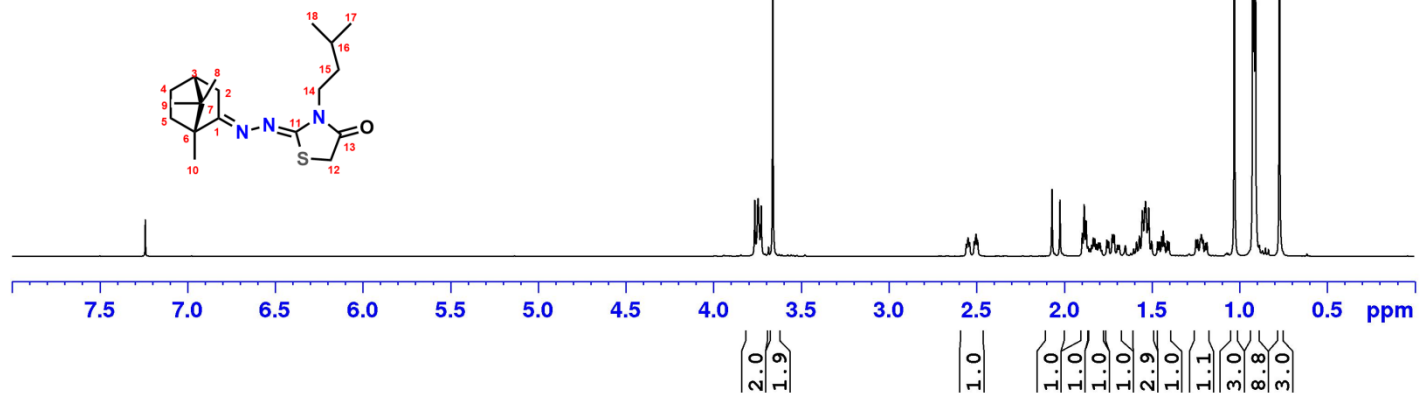

# Compound 6d

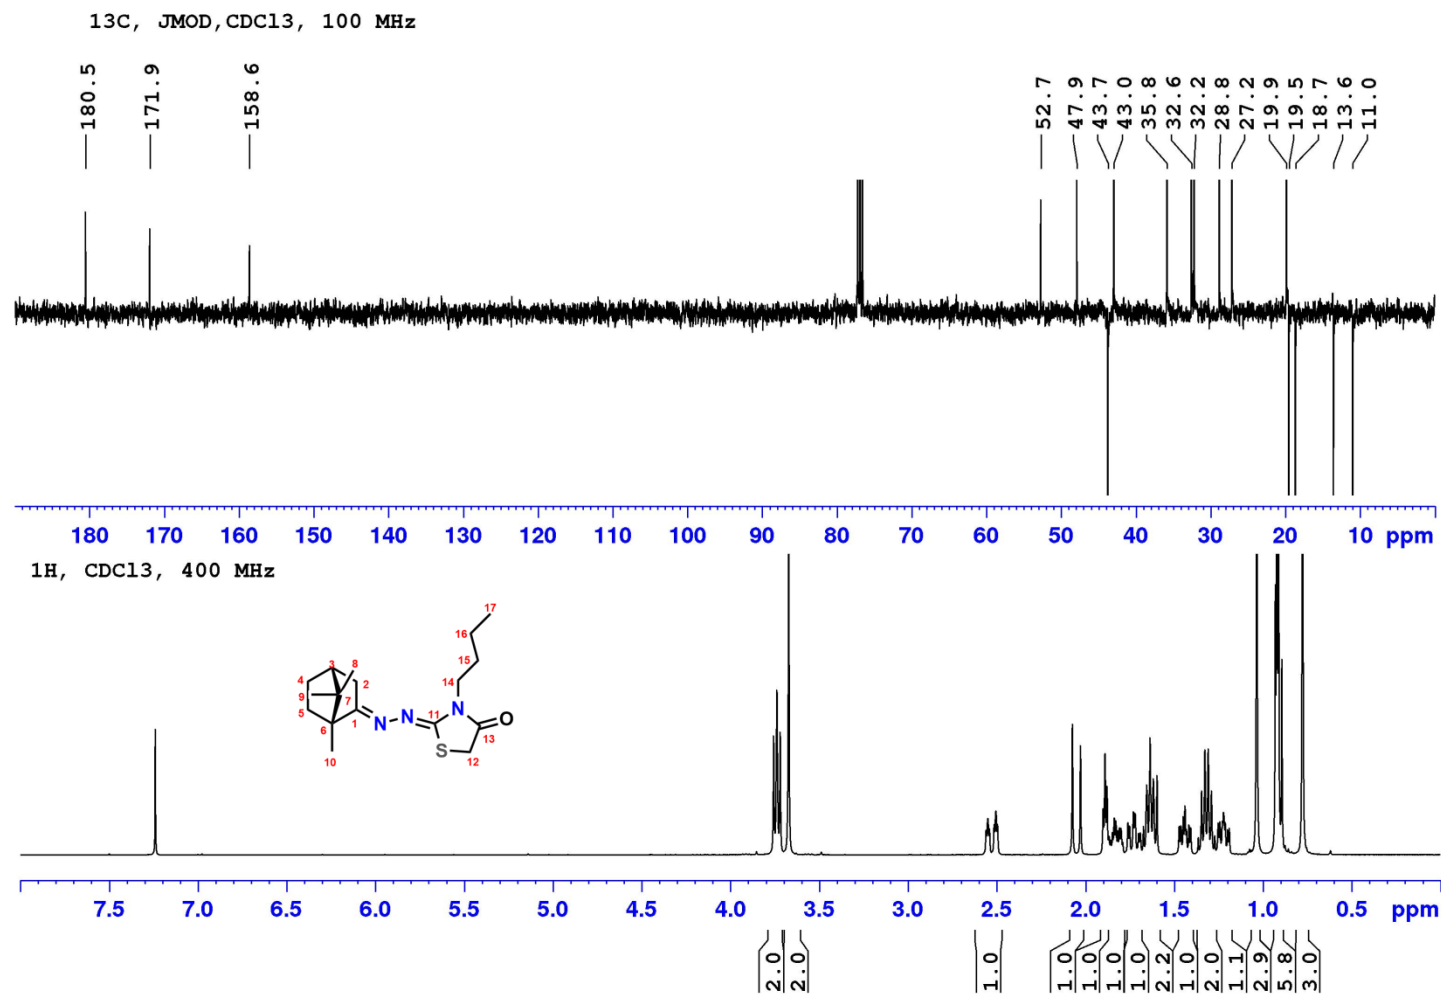

### Compound 7

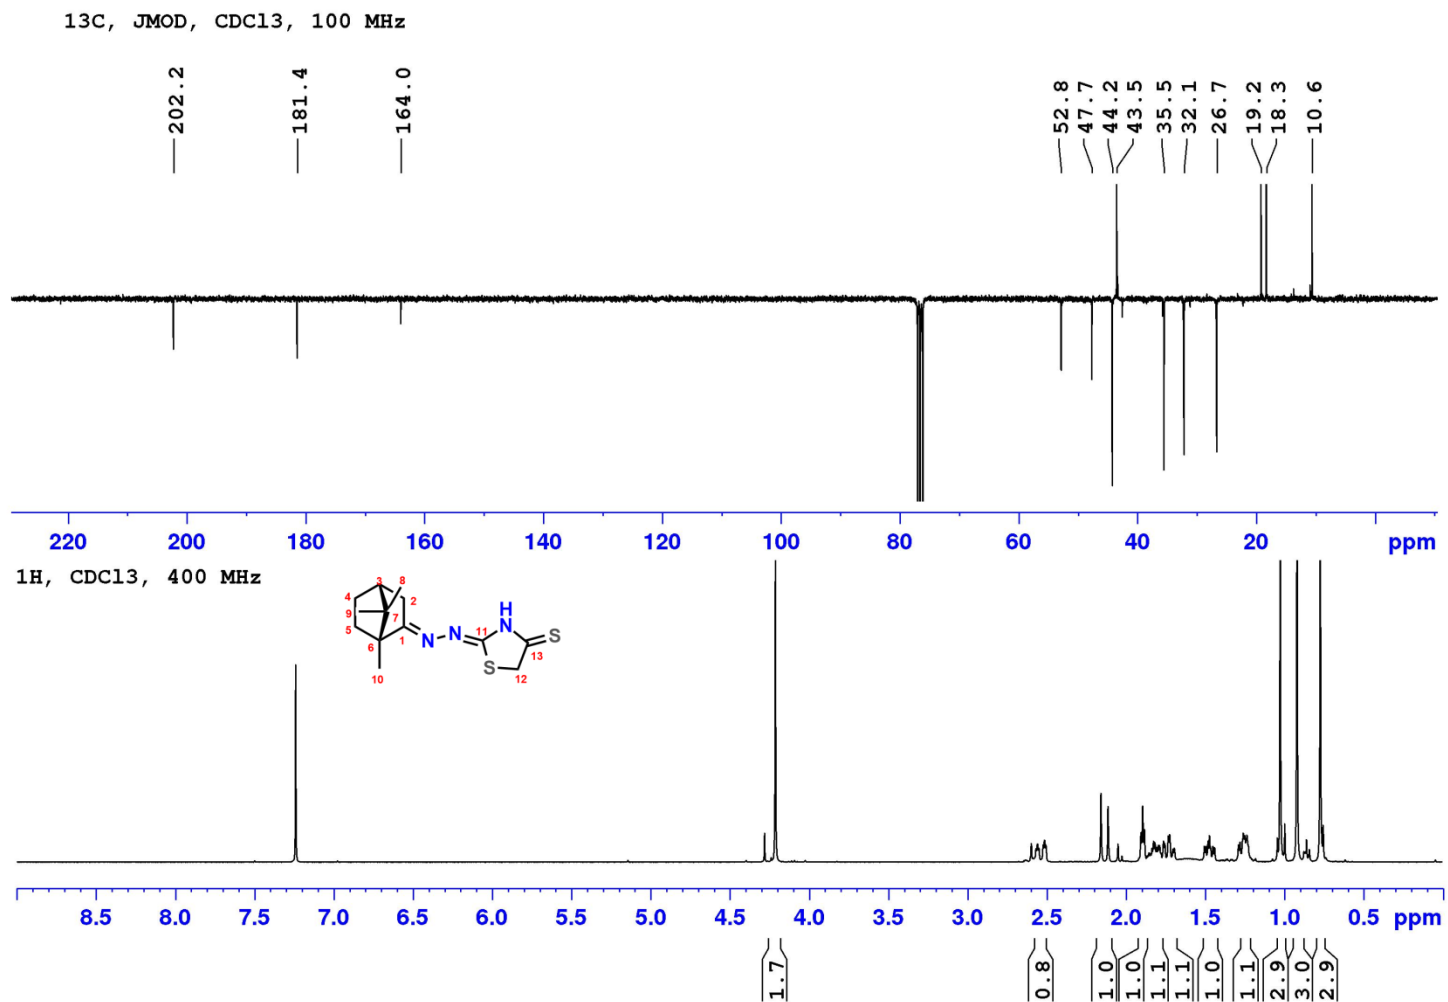

# Compound 8a

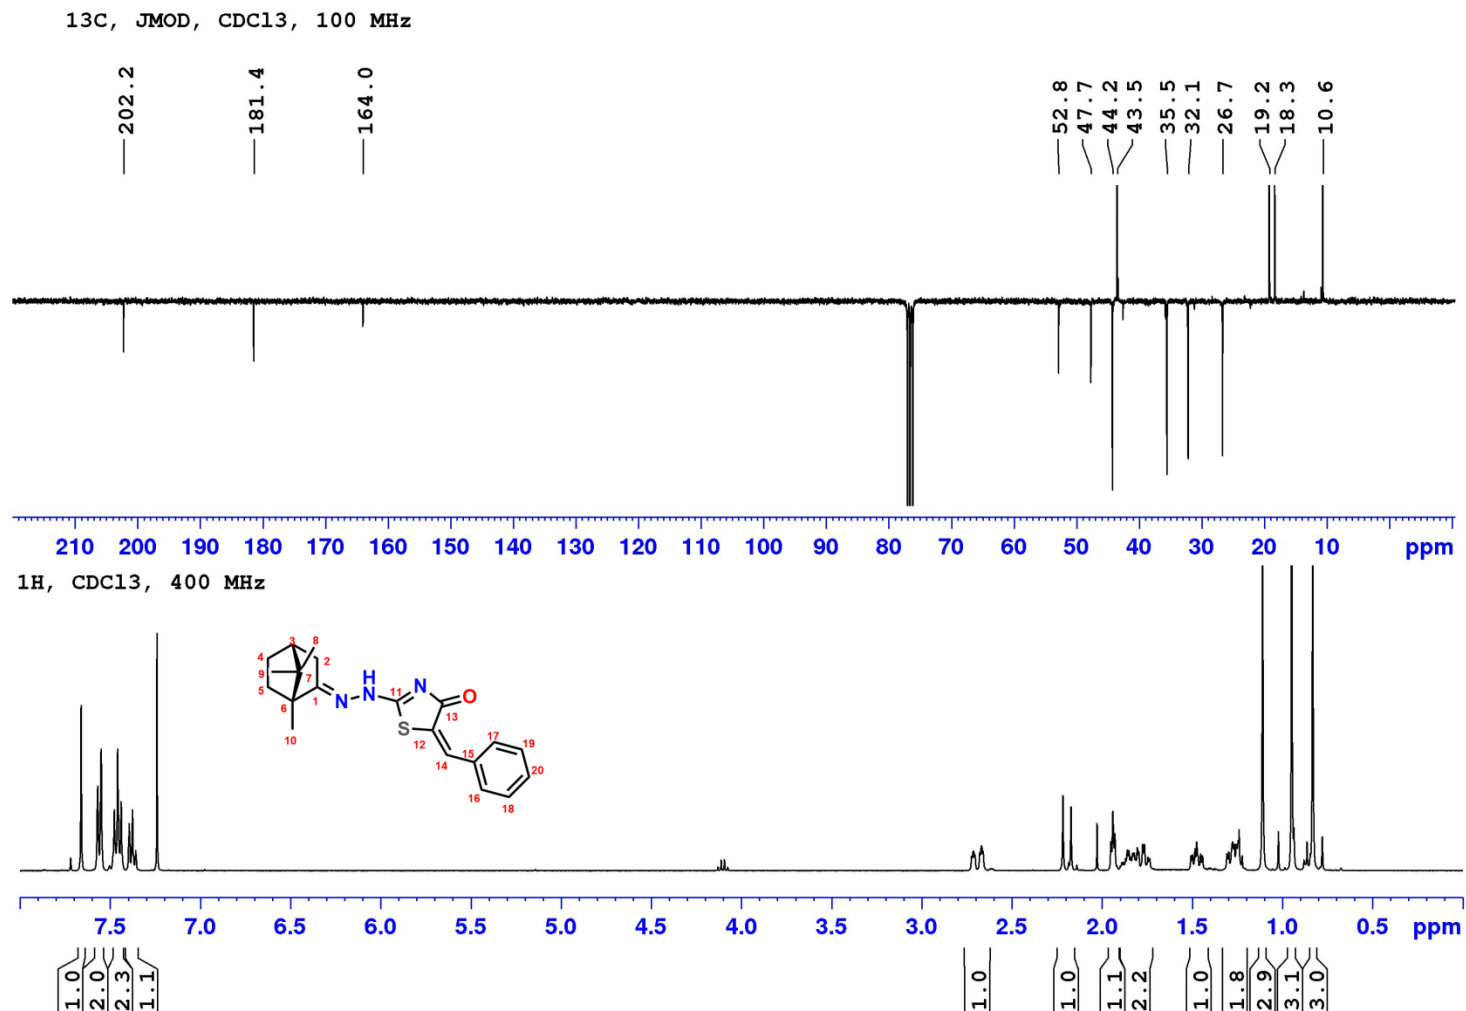

# Compound 8b

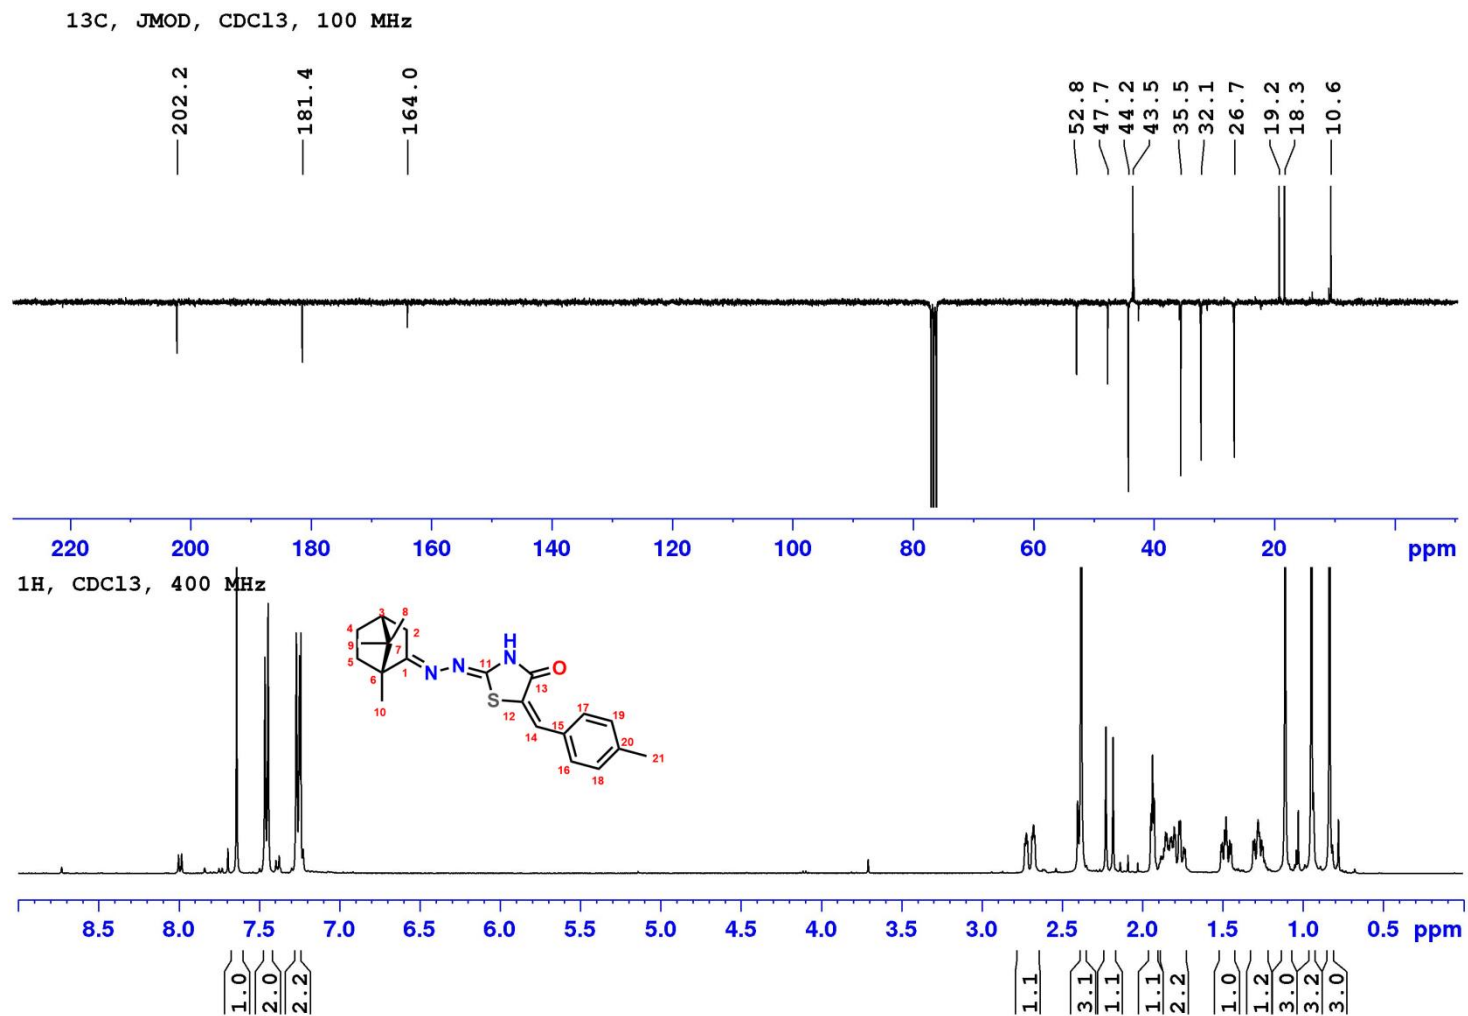

Supplement: c8md00347e1.pdf [file c8md00347e1.pdf]
